# Supplementary material for: Lamellar nickel hydroxy-halides: anionic exchange synthesis, structural characterization and magnetic behavior
Source: Royal Society of Chemistry journal article supplement (doi:10.1039/c3tc32530j), 2014-01-01
Supplement: c3tc32530j1.pdf [file c3tc32530j1.pdf]

**Table 2 Theoretical weight loss**

The theoretical weight loss was calculated as follows

- 1- First we calculate the molecular weight including the adsorbed polyol molecules (Table below)
- 2- The theoretical weight loss is calculated taking into account that the final product is NiO as established by X-Ray diffraction analysis. The employed equation is:  
Weight loss = [ (MW including DEG) – MW (NiO)]/(MW including DEG) where MW(NiO) is equal to 74.7 g/Mol  
Example of calculation: LHS-Ni-OAc  
%Weight loss = (127.91- 74.7)/127.91

| Compound   | Chemical formula                                                                          | DEG   | MW including DEG (g/Mol) | Calculated Weight loss (%) |
|------------|-------------------------------------------------------------------------------------------|-------|--------------------------|----------------------------|
| LHS-Ni-OAc | $\text{Ni}(\text{OH})_{1.49}(\text{CH}_3\text{CO}_2)_{0.51} \cdot 0.46\text{H}_2\text{O}$ | 0.052 | 127.91                   | 41.6                       |
| LHS-Ni-I   | $\text{Ni}(\text{OH})_{1.83}\text{I}_{0.17} \cdot 0.64\text{H}_2\text{O}$                 | 0.041 | 127.25                   | 41.3                       |
| LHS-Ni-Br  | $\text{Ni}(\text{OH})_{1.84}\text{Br}_{0.16} \cdot 0.68\text{H}_2\text{O}$                | 0.046 | 119.88                   | 37.7                       |
| LHS-Ni-Cl  | $\text{Ni}(\text{OH})_{1.83}\text{Cl}_{0.17} \cdot 0.40\text{H}_2\text{O}$                | 0.035 | 106.76                   | 30.0                       |
