# Supplementary figures and images for: Lamellar nickel hydroxy-halides: anionic exchange synthesis, structural characterization and magnetic behavior
Source: Royal Society of Chemistry journal article supplement (doi:10.1039/c3tc32530j), 2014-01-01

Supp. INFOS 2

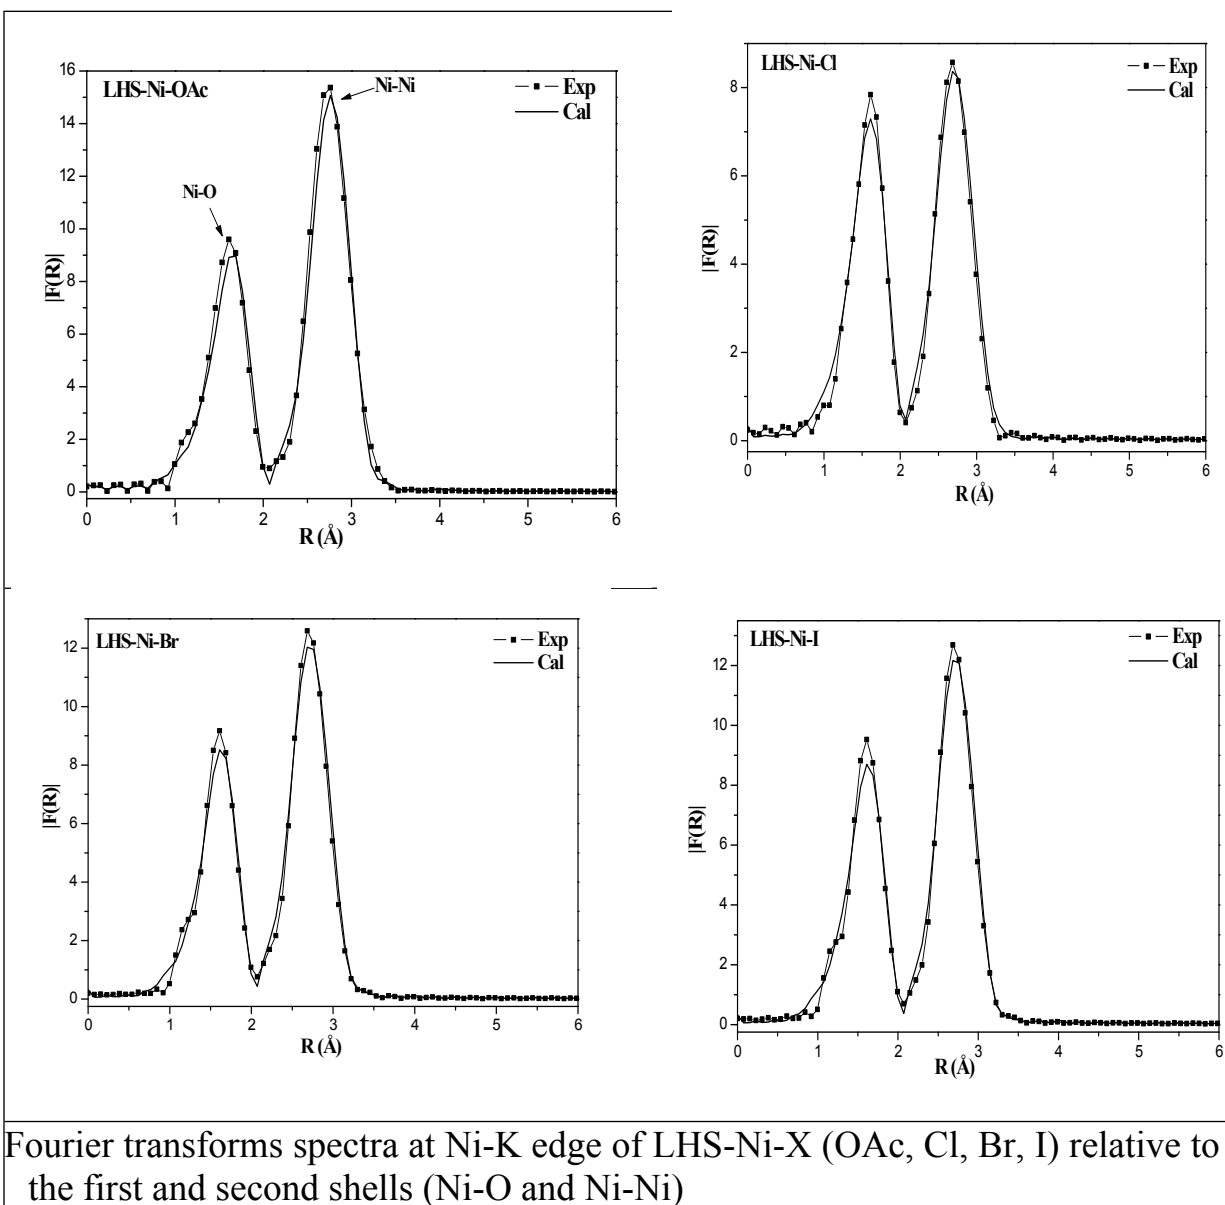

Supplement: c3tc32530j2.pdf [file c3tc32530j2.pdf]
